# Supplementary material
Source: MDPI journal article supplement (https://www.mdpi.com/2073-4352/2/4/1434)
Supplement: s1 [file s1]

 
data_kk-cubrb 
  
_audit_creation_method            SHELXL-97 
_chemical_name_systematic 
; 
 ? 
; 
_chemical_name_common             ? 
_chemical_melting_point           ? 
_chemical_formula_moiety          ? 
_chemical_formula_sum 
 'C5 H12 Br3 Cu2 N' 
_chemical_formula_weight          452.97 
  
loop_ 
 _atom_type_symbol 
 _atom_type_description 
 _atom_type_scat_dispersion_real 
 _atom_type_scat_dispersion_imag 
 _atom_type_scat_source 
 'C'  'C'   0.0033   0.0016 
 'International Tables Vol C Tables 4.2.6.8 and 6.1.1.4' 
 'H'  'H'   0.0000   0.0000 
 'International Tables Vol C Tables 4.2.6.8 and 6.1.1.4' 
 'N'  'N'   0.0061   0.0033 
 'International Tables Vol C Tables 4.2.6.8 and 6.1.1.4' 
 'Cu'  'Cu'   0.3201   1.2651 
 'International Tables Vol C Tables 4.2.6.8 and 6.1.1.4' 
 'Br'  'Br'  -0.2901   2.4595 
 'International Tables Vol C Tables 4.2.6.8 and 6.1.1.4' 
  
_symmetry_cell_setting            triclinic 
_symmetry_space_group_name_H-M    P-1 
  
loop_ 
 _symmetry_equiv_pos_as_xyz 
 'x, y, z' 
 '-x, -y, -z' 
  
_cell_length_a                    6.2948(10) 
_cell_length_b                    8.2624(14) 
_cell_length_c                    10.7612(17) 
_cell_angle_alpha                 75.964(19) 
_cell_angle_beta                  89.232(19) 
_cell_angle_gamma                 84.072(19) 
_cell_volume                      540.04(15) 
_cell_formula_units_Z             2 
_cell_measurement_temperature     173(2) 
_cell_measurement_reflns_used     3390 
_cell_measurement_theta_min       2.15 
_cell_measurement_theta_max       25.75 
  
_exptl_crystal_description        rod 
_exptl_crystal_colour             colourless 
_exptl_crystal_size_max           0.45 
_exptl_crystal_size_mid           0.15 
_exptl_crystal_size_min           0.10 
_exptl_crystal_density_meas       none 
_exptl_crystal_density_diffrn     2.786 
_exptl_crystal_density_method     'not measured' 
_exptl_crystal_F_000              424 
_exptl_absorpt_coefficient_mu     14.978 
_exptl_absorpt_correction_type    empirical 
_exptl_absorpt_correction_T_min   0.102 
_exptl_absorpt_correction_T_max   0.566 
_exptl_absorpt_process_details    'DELrefABS, (PLATON03, Speck, 2003)' 
  
_exptl_special_details 
; 
 ? 
; 
  
_diffrn_ambient_temperature       173(2) 
_diffrn_radiation_wavelength      0.71073 
_diffrn_radiation_type            MoK\a 
_diffrn_radiation_source          'fine-focus sealed tube' 
_diffrn_radiation_monochromator   graphite 
_diffrn_measurement_device_type   'STOE IPDS' 
_diffrn_measurement_method        'phi oscillation' 
_diffrn_detector_area_resol_mean  0.81\%A 
_diffrn_standards_number          0 
_diffrn_standards_interval_count  0 
_diffrn_standards_interval_time   0 
_diffrn_standards_decay_%         0 
_diffrn_reflns_number             4244 
_diffrn_reflns_av_R_equivalents   0.0687 
_diffrn_reflns_av_sigmaI/netI     0.0702 
_diffrn_reflns_limit_h_min        -7 
_diffrn_reflns_limit_h_max        7 
_diffrn_reflns_limit_k_min        -10 
_diffrn_reflns_limit_k_max        10 
_diffrn_reflns_limit_l_min        -13 
_diffrn_reflns_limit_l_max        13 
_diffrn_reflns_theta_min          1.95 
_diffrn_reflns_theta_max          25.96 
_reflns_number_total              1967 
_reflns_number_gt                 1456 
_reflns_threshold_expression      >2sigma(I) 
  
_computing_data_collection        'EXPOSE (Stoe IPDS Software, 2000)' 
_computing_cell_refinement        'CELL (Stoe IPDS Software, 2000)' 
_computing_data_reduction         'INTEGRATE (Stoe IPDS Software, 2000)' 
_computing_structure_solution     'SHELXS-97 (Sheldrick, 1990)' 
_computing_structure_refinement   'SHELXL-97 (Sheldrick, 1997)' 
_computing_molecular_graphics     'PLATON99 (Spek, 1990)' 
_computing_publication_material   'SHELXL-97 (Sheldrick, 1997)' 
  
_refine_special_details 
; 
 Refinement of F^2^ against ALL reflections.  The weighted R-factor wR and 
 goodness of fit S are based on F^2^, conventional R-factors R are based 
 on F, with F set to zero for negative F^2^. The threshold expression of 
 F^2^ > 2sigma(F^2^) is used only for calculating R-factors(gt) etc. and is 
 not relevant to the choice of reflections for refinement.  R-factors based 
 on F^2^ are statistically about twice as large as those based on F, and R- 
 factors based on ALL data will be even larger. 
; 
  
_refine_ls_structure_factor_coef  Fsqd 
_refine_ls_matrix_type            full 
_refine_ls_weighting_scheme       calc 
_refine_ls_weighting_details 
 'calc w=1/[\s^2^(Fo^2^)+(0.0972P)^2^] where P=(Fo^2^+2Fc^2^)/3' 
_atom_sites_solution_primary      direct 
_atom_sites_solution_secondary    difmap 
_atom_sites_solution_hydrogens    geom 
_refine_ls_hydrogen_treatment     constr 
_refine_ls_extinction_method      SHELXL 
_refine_ls_extinction_coef        0.0042(13) 
_refine_ls_extinction_expression 
 'Fc^*^=kFc[1+0.001xFc^2^\l^3^/sin(2\q)]^-1/4^' 
_refine_ls_number_reflns          1967 
_refine_ls_number_parameters      101 
_refine_ls_number_restraints      0 
_refine_ls_R_factor_all           0.0689 
_refine_ls_R_factor_gt            0.0534 
_refine_ls_wR_factor_ref          0.1459 
_refine_ls_wR_factor_gt           0.1298 
_refine_ls_goodness_of_fit_ref    0.979 
_refine_ls_restrained_S_all       0.979 
_refine_ls_shift/su_max           0.000 
_refine_ls_shift/su_mean          0.000 
  
loop_ 
 _atom_site_label 
 _atom_site_type_symbol 
 _atom_site_fract_x 
 _atom_site_fract_y 
 _atom_site_fract_z 
 _atom_site_U_iso_or_equiv 
 _atom_site_adp_type 
 _atom_site_occupancy 
 _atom_site_symmetry_multiplicity 
 _atom_site_calc_flag 
 _atom_site_refinement_flags 
 _atom_site_disorder_assembly 
 _atom_site_disorder_group 
C1 C 0.0365(14) 0.7447(10) 1.3342(8) 0.0282(19) Uani 1 1 d . . . 
H1A H -0.0590 0.8471 1.3243 0.034 Uiso 1 1 calc R . . 
H1B H -0.0487 0.6547 1.3302 0.034 Uiso 1 1 calc R . . 
C2 C 0.1470(17) 0.7054(11) 1.4614(8) 0.036(2) Uani 1 1 d . . . 
H2A H 0.2289 0.5963 1.4758 0.043 Uiso 1 1 calc R . . 
H2B H 0.0414 0.7006 1.5283 0.043 Uiso 1 1 calc R . . 
C3 C 0.2956(17) 0.8373(11) 1.4685(9) 0.036(2) Uani 1 1 d . . . 
H3A H 0.2122 0.9443 1.4633 0.044 Uiso 1 1 calc R . . 
H3B H 0.3720 0.8053 1.5499 0.044 Uiso 1 1 calc R . . 
C4 C 0.4548(17) 0.8549(11) 1.3595(10) 0.042(2) Uani 1 1 d . . . 
H4A H 0.5419 0.9443 1.3621 0.050 Uiso 1 1 calc R . . 
H4B H 0.5485 0.7515 1.3703 0.050 Uiso 1 1 calc R . . 
C5 C 0.3429(16) 0.8929(10) 1.2324(9) 0.030(2) Uani 1 1 d . . . 
H5A H 0.2631 1.0029 1.2170 0.037 Uiso 1 1 calc R . . 
H5B H 0.4479 0.8952 1.1654 0.037 Uiso 1 1 calc R . . 
N1 N 0.1945(13) 0.7657(8) 1.2271(6) 0.0272(16) Uani 1 1 d . . . 
H1C H 0.2711 0.6664 1.2308 0.033 Uiso 1 1 calc R . . 
H1D H 0.1232 0.7964 1.1518 0.033 Uiso 1 1 calc R . . 
Cu1 Cu 0.4716(2) 0.64747(14) 0.89500(12) 0.0406(4) Uani 1 1 d . . . 
Cu2 Cu -0.0061(2) 0.64087(14) 0.88872(13) 0.0423(4) Uani 1 1 d . . . 
Br1 Br 0.26840(13) 0.38829(8) 0.91082(7) 0.0239(3) Uani 1 1 d . . . 
Br2 Br 0.19606(14) 0.86933(9) 0.90300(7) 0.0244(3) Uani 1 1 d . . . 
Br3 Br 0.72828(14) 0.65467(9) 0.72564(7) 0.0254(3) Uani 1 1 d . . . 
  
loop_ 
 _atom_site_aniso_label 
 _atom_site_aniso_U_11 
 _atom_site_aniso_U_22 
 _atom_site_aniso_U_33 
 _atom_site_aniso_U_23 
 _atom_site_aniso_U_13 
 _atom_site_aniso_U_12 
C1 0.015(5) 0.041(4) 0.029(5) -0.006(3) 0.000(4) -0.010(3) 
C2 0.043(7) 0.041(5) 0.021(4) -0.004(3) 0.011(4) -0.004(4) 
C3 0.034(6) 0.053(5) 0.028(5) -0.020(4) -0.018(4) -0.001(4) 
C4 0.034(7) 0.034(5) 0.055(7) -0.009(4) -0.008(5) 0.001(4) 
C5 0.033(6) 0.029(4) 0.033(5) -0.010(3) 0.011(4) -0.012(3) 
N1 0.041(5) 0.032(3) 0.008(3) -0.001(2) -0.004(3) -0.008(3) 
Cu1 0.0366(8) 0.0412(6) 0.0432(8) -0.0119(5) 0.0118(6) 0.0026(5) 
Cu2 0.0417(9) 0.0394(6) 0.0473(8) -0.0122(5) -0.0107(6) -0.0057(5) 
Br1 0.0230(6) 0.0266(4) 0.0225(5) -0.0075(3) -0.0005(3) -0.0011(3) 
Br2 0.0239(6) 0.0236(4) 0.0239(5) -0.0029(3) 0.0008(3) -0.0006(3) 
Br3 0.0273(6) 0.0285(4) 0.0204(4) -0.0065(3) 0.0026(4) -0.0011(3) 
  
_geom_special_details 
; 
 All esds (except the esd in the dihedral angle between two l.s. planes) 
 are estimated using the full covariance matrix.  The cell esds are taken 
 into account individually in the estimation of esds in distances, angles 
 and torsion angles; correlations between esds in cell parameters are only 
 used when they are defined by crystal symmetry.  An approximate (isotropic) 
 treatment of cell esds is used for estimating esds involving l.s. planes. 
; 
  
loop_ 
 _geom_bond_atom_site_label_1 
 _geom_bond_atom_site_label_2 
 _geom_bond_distance 
 _geom_bond_site_symmetry_2 
 _geom_bond_publ_flag 
C1 C2 1.492(12) . ? 
C1 N1 1.502(10) . ? 
C1 H1A 0.9700 . ? 
C1 H1B 0.9700 . ? 
C2 C3 1.524(14) . ? 
C2 H2A 0.9700 . ? 
C2 H2B 0.9700 . ? 
C3 C4 1.522(14) . ? 
C3 H3A 0.9700 . ? 
C3 H3B 0.9700 . ? 
C4 C5 1.495(13) . ? 
C4 H4A 0.9700 . ? 
C4 H4B 0.9700 . ? 
C5 N1 1.488(10) . ? 
C5 H5A 0.9700 . ? 
C5 H5B 0.9700 . ? 
N1 H1C 0.9000 . ? 
N1 H1D 0.9000 . ? 
Cu1 Br2 2.4065(14) . ? 
Cu1 Br3 2.4134(15) . ? 
Cu1 Br1 2.5755(15) . ? 
Cu1 Br1 2.6126(17) 2_667 ? 
Cu1 Cu1 2.889(2) 2_667 ? 
Cu1 Cu2 3.015(2) . ? 
Cu2 Br3 2.4147(16) 1_455 ? 
Cu2 Br2 2.4184(14) . ? 
Cu2 Br1 2.5343(16) . ? 
Cu2 Br1 2.6781(17) 2_567 ? 
Cu2 Cu2 2.902(3) 2_567 ? 
Br1 Cu1 2.6126(17) 2_667 ? 
Br1 Cu2 2.6781(17) 2_567 ? 
Br3 Cu2 2.4147(16) 1_655 ? 
  
loop_ 
 _geom_angle_atom_site_label_1 
 _geom_angle_atom_site_label_2 
 _geom_angle_atom_site_label_3 
 _geom_angle 
 _geom_angle_site_symmetry_1 
 _geom_angle_site_symmetry_3 
 _geom_angle_publ_flag 
C2 C1 N1 111.1(7) . . ? 
C2 C1 H1A 109.4 . . ? 
N1 C1 H1A 109.4 . . ? 
C2 C1 H1B 109.4 . . ? 
N1 C1 H1B 109.4 . . ? 
H1A C1 H1B 108.0 . . ? 
C1 C2 C3 111.2(7) . . ? 
C1 C2 H2A 109.4 . . ? 
C3 C2 H2A 109.4 . . ? 
C1 C2 H2B 109.4 . . ? 
C3 C2 H2B 109.4 . . ? 
H2A C2 H2B 108.0 . . ? 
C4 C3 C2 110.5(7) . . ? 
C4 C3 H3A 109.6 . . ? 
C2 C3 H3A 109.6 . . ? 
C4 C3 H3B 109.6 . . ? 
C2 C3 H3B 109.6 . . ? 
H3A C3 H3B 108.1 . . ? 
C5 C4 C3 111.2(8) . . ? 
C5 C4 H4A 109.4 . . ? 
C3 C4 H4A 109.4 . . ? 
C5 C4 H4B 109.4 . . ? 
C3 C4 H4B 109.4 . . ? 
H4A C4 H4B 108.0 . . ? 
N1 C5 C4 111.4(7) . . ? 
N1 C5 H5A 109.3 . . ? 
C4 C5 H5A 109.3 . . ? 
N1 C5 H5B 109.3 . . ? 
C4 C5 H5B 109.3 . . ? 
H5A C5 H5B 108.0 . . ? 
C5 N1 C1 112.8(6) . . ? 
C5 N1 H1C 109.0 . . ? 
C1 N1 H1C 109.0 . . ? 
C5 N1 H1D 109.0 . . ? 
C1 N1 H1D 109.0 . . ? 
H1C N1 H1D 107.8 . . ? 
Br2 Cu1 Br3 124.86(6) . . ? 
Br2 Cu1 Br1 104.25(6) . . ? 
Br3 Cu1 Br1 107.66(5) . . ? 
Br2 Cu1 Br1 108.18(5) . 2_667 ? 
Br3 Cu1 Br1 99.62(6) . 2_667 ? 
Br1 Cu1 Br1 112.34(5) . 2_667 ? 
Br2 Cu1 Cu1 120.11(7) . 2_667 ? 
Br3 Cu1 Cu1 114.94(7) . 2_667 ? 
Br1 Cu1 Cu1 56.78(5) . 2_667 ? 
Br1 Cu1 Cu1 55.56(5) 2_667 2_667 ? 
Br2 Cu1 Cu2 51.50(4) . . ? 
Br3 Cu1 Cu2 129.94(6) . . ? 
Br1 Cu1 Cu2 53.21(4) . . ? 
Br1 Cu1 Cu2 130.09(6) 2_667 . ? 
Cu1 Cu1 Cu2 92.78(7) 2_667 . ? 
Br3 Cu2 Br2 124.72(6) 1_455 . ? 
Br3 Cu2 Br1 112.23(5) 1_455 . ? 
Br2 Cu2 Br1 105.16(6) . . ? 
Br3 Cu2 Br1 97.80(5) 1_455 2_567 ? 
Br2 Cu2 Br1 103.99(5) . 2_567 ? 
Br1 Cu2 Br1 112.39(5) . 2_567 ? 
Br3 Cu2 Cu2 117.10(7) 1_455 2_567 ? 
Br2 Cu2 Cu2 116.83(7) . 2_567 ? 
Br1 Cu2 Cu2 58.56(5) . 2_567 ? 
Br1 Cu2 Cu2 53.84(5) 2_567 2_567 ? 
Br3 Cu2 Cu1 135.67(6) 1_455 . ? 
Br2 Cu2 Cu1 51.15(4) . . ? 
Br1 Cu2 Cu1 54.48(4) . . ? 
Br1 Cu2 Cu1 126.53(6) 2_567 . ? 
Cu2 Cu2 Cu1 92.40(7) 2_567 . ? 
Cu2 Br1 Cu1 72.31(5) . . ? 
Cu2 Br1 Cu1 112.33(5) . 2_667 ? 
Cu1 Br1 Cu1 67.66(5) . 2_667 ? 
Cu2 Br1 Cu2 67.61(5) . 2_567 ? 
Cu1 Br1 Cu2 108.78(5) . 2_567 ? 
Cu1 Br1 Cu2 76.69(5) 2_667 2_567 ? 
Cu1 Br2 Cu2 77.34(5) . . ? 
Cu1 Br3 Cu2 85.68(6) . 1_655 ? 
  
loop_ 
 _geom_torsion_atom_site_label_1 
 _geom_torsion_atom_site_label_2 
 _geom_torsion_atom_site_label_3 
 _geom_torsion_atom_site_label_4 
 _geom_torsion 
 _geom_torsion_site_symmetry_1 
 _geom_torsion_site_symmetry_2 
 _geom_torsion_site_symmetry_3 
 _geom_torsion_site_symmetry_4 
 _geom_torsion_publ_flag 
N1 C1 C2 C3 54.9(10) . . . . ? 
C1 C2 C3 C4 -55.7(10) . . . . ? 
C2 C3 C4 C5 55.4(10) . . . . ? 
C3 C4 C5 N1 -54.9(9) . . . . ? 
C4 C5 N1 C1 54.7(10) . . . . ? 
C2 C1 N1 C5 -54.7(9) . . . . ? 
Br2 Cu1 Cu2 Br3 102.83(8) . . . 1_455 ? 
Br3 Cu1 Cu2 Br3 -3.83(11) . . . 1_455 ? 
Br1 Cu1 Cu2 Br3 -86.23(8) . . . 1_455 ? 
Br1 Cu1 Cu2 Br3 -175.71(6) 2_667 . . 1_455 ? 
Cu1 Cu1 Cu2 Br3 -130.08(7) 2_667 . . 1_455 ? 
Br3 Cu1 Cu2 Br2 -106.66(7) . . . . ? 
Br1 Cu1 Cu2 Br2 170.94(6) . . . . ? 
Br1 Cu1 Cu2 Br2 81.46(7) 2_667 . . . ? 
Cu1 Cu1 Cu2 Br2 127.09(7) 2_667 . . . ? 
Br2 Cu1 Cu2 Br1 -170.94(6) . . . . ? 
Br3 Cu1 Cu2 Br1 82.41(7) . . . . ? 
Br1 Cu1 Cu2 Br1 -89.48(7) 2_667 . . . ? 
Cu1 Cu1 Cu2 Br1 -43.84(5) 2_667 . . . ? 
Br2 Cu1 Cu2 Br1 -77.86(6) . . . 2_567 ? 
Br3 Cu1 Cu2 Br1 175.48(5) . . . 2_567 ? 
Br1 Cu1 Cu2 Br1 93.07(6) . . . 2_567 ? 
Br1 Cu1 Cu2 Br1 3.60(9) 2_667 . . 2_567 ? 
Cu1 Cu1 Cu2 Br1 49.23(8) 2_667 . . 2_567 ? 
Br2 Cu1 Cu2 Cu2 -123.12(7) . . . 2_567 ? 
Br3 Cu1 Cu2 Cu2 130.23(7) . . . 2_567 ? 
Br1 Cu1 Cu2 Cu2 47.82(5) . . . 2_567 ? 
Br1 Cu1 Cu2 Cu2 -41.66(8) 2_667 . . 2_567 ? 
Cu1 Cu1 Cu2 Cu2 3.98(7) 2_667 . . 2_567 ? 
Br3 Cu2 Br1 Cu1 131.13(6) 1_455 . . . ? 
Br2 Cu2 Br1 Cu1 -7.30(5) . . . . ? 
Br1 Cu2 Br1 Cu1 -119.79(6) 2_567 . . . ? 
Cu2 Cu2 Br1 Cu1 -119.79(6) 2_567 . . . ? 
Br3 Cu2 Br1 Cu1 -173.09(5) 1_455 . . 2_667 ? 
Br2 Cu2 Br1 Cu1 48.49(7) . . . 2_667 ? 
Br1 Cu2 Br1 Cu1 -64.00(6) 2_567 . . 2_667 ? 
Cu2 Cu2 Br1 Cu1 -64.00(6) 2_567 . . 2_667 ? 
Cu1 Cu2 Br1 Cu1 55.79(6) . . . 2_667 ? 
Br3 Cu2 Br1 Cu2 -109.08(7) 1_455 . . 2_567 ? 
Br2 Cu2 Br1 Cu2 112.49(7) . . . 2_567 ? 
Br1 Cu2 Br1 Cu2 0.0 2_567 . . 2_567 ? 
Cu1 Cu2 Br1 Cu2 119.79(6) . . . 2_567 ? 
Br2 Cu1 Br1 Cu2 7.31(5) . . . . ? 
Br3 Cu1 Br1 Cu2 -127.11(6) . . . . ? 
Br1 Cu1 Br1 Cu2 124.21(6) 2_667 . . . ? 
Cu1 Cu1 Br1 Cu2 124.21(6) 2_667 . . . ? 
Br2 Cu1 Br1 Cu1 -116.90(7) . . . 2_667 ? 
Br3 Cu1 Br1 Cu1 108.69(7) . . . 2_667 ? 
Br1 Cu1 Br1 Cu1 0.0 2_667 . . 2_667 ? 
Cu2 Cu1 Br1 Cu1 -124.21(6) . . . 2_667 ? 
Br2 Cu1 Br1 Cu2 -50.63(6) . . . 2_567 ? 
Br3 Cu1 Br1 Cu2 174.95(5) . . . 2_567 ? 
Br1 Cu1 Br1 Cu2 66.26(6) 2_667 . . 2_567 ? 
Cu1 Cu1 Br1 Cu2 66.26(6) 2_667 . . 2_567 ? 
Cu2 Cu1 Br1 Cu2 -57.94(6) . . . 2_567 ? 
Br3 Cu1 Br2 Cu2 116.47(8) . . . . ? 
Br1 Cu1 Br2 Cu2 -7.48(5) . . . . ? 
Br1 Cu1 Br2 Cu2 -127.23(6) 2_667 . . . ? 
Cu1 Cu1 Br2 Cu2 -67.08(9) 2_667 . . . ? 
Br3 Cu2 Br2 Cu1 -124.01(8) 1_455 . . . ? 
Br1 Cu2 Br2 Cu1 7.63(5) . . . . ? 
Br1 Cu2 Br2 Cu1 125.94(6) 2_567 . . . ? 
Cu2 Cu2 Br2 Cu1 69.69(8) 2_567 . . . ? 
Br2 Cu1 Br3 Cu2 116.64(8) . . . 1_655 ? 
Br1 Cu1 Br3 Cu2 -120.90(6) . . . 1_655 ? 
Br1 Cu1 Br3 Cu2 -3.61(4) 2_667 . . 1_655 ? 
Cu1 Cu1 Br3 Cu2 -59.98(8) 2_667 . . 1_655 ? 
Cu2 Cu1 Br3 Cu2 -177.32(7) . . . 1_655 ? 
  
loop_ 
 _geom_hbond_atom_site_label_D 
 _geom_hbond_atom_site_label_H 
 _geom_hbond_atom_site_label_A 
 _geom_hbond_distance_DH 
 _geom_hbond_distance_HA 
 _geom_hbond_distance_DA 
 _geom_hbond_angle_DHA 
 _geom_hbond_site_symmetry_A 
N1 H1D Br2  0.90 2.64 3.384(6) 140.3 . 
N1 H1C Br3  0.90 2.58 3.370(6) 147.1 2_667 
  
_diffrn_measured_fraction_theta_max    0.925 
_diffrn_reflns_theta_full              25.96 
_diffrn_measured_fraction_theta_full   0.925 
_refine_diff_density_max    1.522 
_refine_diff_density_min   -1.679 
_refine_diff_density_rms    0.348 

# start Validation Reply Form 
_vrf_PLAT029_I 
; 
PROBLEM: _diffrn_measured_fraction_theta_full Low ....... 0.925 
RESPONSE: For a triclinic system, max. 93% of the data are 
accessible with the STOE IPDS. Nevertheless,  
with a parameter / observed reflection ratio of 1:>10, the
structure has been refined with high precisions on bond
distances and angles. 
; 
# end Validation Reply Form
